# Supplementary material
Source: Springer Nature journal article supplement (http://springerprofessional.de/resource/supplementary/13688_2024_456_MOESM1_ESM.pdf/26832552)
Supplement: MOESM1 [file 26832552]

# Evaluating Twitter’s Algorithmic Amplification of Low-Credibility Content: An Observational Study - Supplementary Materials

## **1 Baseline Stratification - Quantile-based Discretization**

To facilitate the analysis in this study, it was necessary to reduce the overall complexity of the data by clustering the stratification variables into well-defined and comparable bins capturing different clusters for engagement and followers counts profiles. For this purpose, this study relies on quantile-based discretization, an approach that divides the data into similar-sized buckets based on existing quantiles. For the discretization of engagement and followers data, it was observed that by leaving the number of bins free to vary, this converged at 4 bins, which can be considered a division into four clusters, one with the lowest values, (bottom 25%), one with medium values (25 to 50%), one with high values (50 to 75%) and finally a cluster with very high values (75 to 100%). In order to minimise the impact of outliers while binning the data, follower counts and total engagement were initially normalised using a logarithmic scale, which ensures that the bins created are less skewed by outliers. Nonetheless, as it can be expected, the distribution following traditional social media power laws, where the bin containing very high values has a larger range of values. This was not considered concerning, particularly as the use of bootstrapping with a high number of iteration should minimise any such imbalances in the data. Detailed information on the characteristics of each cluster can be found in Tables 1 to 4 below.

Table 1: Clustering - Climate Low Credibility

| followers_cluster | engagement_cluster | engagement_min | engagement_max | engagement_mean | engagement_median | impressions_min | impressions_max | impressions_mean | impressions_median | followers_min | followers_max | followers_mean | followers_median |
|-------------------|--------------------|----------------|----------------|-----------------|-------------------|-----------------|-----------------|------------------|--------------------|---------------|---------------|----------------|------------------|
| 0                 | 0                  | 0              | 0              | 0.0             | 0                 | 0               | 371             | 7.6              | 4                  | 0             | 164           | 49.8           | 34               |
| 0                 | 1                  | 1              | 2              | 1.3             | 1                 | 0               | 537             | 27.8             | 16                 | 0             | 164           | 59.5           | 43               |
| 0                 | 2                  | 3              | 7              | 3.9             | 3                 | 2               | 653             | 113.9            | 55                 | 4             | 164           | 71.5           | 67               |
| 0                 | 3                  | 9              | 55             | 23.9            | 18                | 0               | 3234            | 1154.6           | 679                | 43            | 155           | 107.1          | 106              |
| 1                 | 0                  | 0              | 0              | 0.0             | 0                 | 0               | 253             | 9.2              | 6                  | 165           | 938           | 447.3          | 409              |
| 1                 | 1                  | 1              | 2              | 1.3             | 1                 | 0               | 383             | 26.1             | 17                 | 165           | 939           | 468.3          | 407              |
| 1                 | 2                  | 3              | 8              | 4.1             | 4                 | 4               | 1070            | 89.5             | 52                 | 165           | 938           | 512.2          | 470              |
| 1                 | 3                  | 9              | 224            | 38.8            | 17                | 71              | 14126           | 1358.8           | 338                | 165           | 904           | 510.1          | 487              |
| 2                 | 0                  | 0              | 0              | 0.0             | 0                 | 0               | 892             | 14.7             | 8                  | 941           | 4209          | 2054.0         | 1903             |
| 2                 | 1                  | 1              | 2              | 1.3             | 1                 | 1               | 744             | 35.9             | 19                 | 947           | 4224          | 2092.5         | 1714.5           |
| 2                 | 2                  | 3              | 8              | 4.4             | 4                 | 1               | 873             | 98.5             | 61                 | 947           | 4207          | 2168.8         | 1968             |
| 2                 | 3                  | 9              | 470            | 30.3            | 16                | 78              | 80477           | 2397.1           | 327.5              | 1092          | 4216          | 2291.0         | 2220.5           |
| 3                 | 0                  | 0              | 0              | 0.0             | 0                 | 0               | 2663            | 45.8             | 15                 | 4273          | 4325387       | 35211.8        | 7329             |
| 3                 | 1                  | 1              | 2              | 1.5             | 1                 | 3               | 5932            | 136.6            | 41                 | 4269          | 4325387       | 122351.0       | 9922             |
| 3                 | 2                  | 3              | 8              | 4.8             | 4                 | 13              | 12986           | 808.6            | 387                | 4317          | 4715644       | 384054.8       | 13053            |
| 3                 | 3                  | 9              | 56416          | 360.4           | 45                | 46              | 2310333         | 10846.3          | 2325               | 4415          | 4325387       | 224579.3       | 34101            |

Table 2: Clustering - Climate High Credibility

| followers_cluster | engagement_cluster | engagement_min | engagement_max | engagement_mean | engagement_median | impressions_min | impressions_max | impressions_mean | impressions_median | followers_min | followers_max | followers_mean | followers_median |
|-------------------|--------------------|----------------|----------------|-----------------|-------------------|-----------------|-----------------|------------------|--------------------|---------------|---------------|----------------|------------------|
| 0                 | 0                  | 0              | 0              | 0.0             | 0                 | 0               | 972             | 12.1             | 5                  | 0             | 164           | 51.7           | 34               |
| 0                 | 1                  | 1              | 13             | 1.3             | 1                 | 1               | 1927            | 31.9             | 19                 | 0             | 164           | 63.2           | 50               |
| 0                 | 2                  | 3              | 12             | 1.2             | 1                 | 0               | 2108            | 125.1            | 60                 | 1             | 163           | 79.0           | 61.5             |
| 0                 | 3                  | 0              | 708            | 37.4            | 4                 | 0               | 7173            | 798.5            | 108.5              | 0             | 163           | 79.0           | 61.5             |
| 1                 | 0                  | 0              | 0              | 0.0             | 24                | 0               | 454             | 17               | 0                  | 0             | 938           | 466.4          | 433              |
| 1                 | 1                  | 1              | 1              | 1.3             | 0                 | 0               | 1742            | 49.6             | 28                 | 165           | 938           | 471.6          | 436              |
| 1                 | 2                  | 2              | 2              | 1.3             | 1                 | 0               | 1742            | 49.6             | 28                 | 165           | 938           | 471.6          | 436              |
| 1                 | 3                  | 8              | 8              | 4.3             | 4                 | 5               | 11815           | 180.5            | 93                 | 165           | 939           | 490.4          | 450              |
| 1                 | 0                  | 1170           | 1170           | 31.5            | 16                | 18              | 163759          | 2606.8           | 532.5              | 165           | 938           | 540.4          | 519              |
| 2                 | 0                  | 0              | 0              | 0.0             | 0                 | 0               | 1177            | 29.5             | 15                 | 940           | 4244          | 2052.0         | 1856             |
| 2                 | 1                  | 1              | 1              | 1.4             | 1                 | 1               | 8648            | 76.8             | 45                 | 940           | 4252          | 2148.4         | 1968             |
| 2                 | 2                  | 8              | 8              | 4.6             | 4                 | 2               | 18673           | 234.1            | 136                | 942           | 4249          | 2211.1         | 2076             |
| 2                 | 3                  | 2123           | 2123           | 35.6            | 17                | 0               | 123313          | 2049.8           | 673                | 944           | 4244          | 2385.8         | 2295             |
| 3                 | 0                  | 0              | 0              | 0.0             | 0                 | 0               | 4095            | 132.6            | 43                 | 4253          | 3628769       | 29154.0        | 10382.5          |
| 3                 | 1                  | 1              | 1              | 1.4             | 1                 | 0               | 5762            | 334.1            | 131                | 4253          | 8703458       | 76854.7        | 11508.5          |
| 3                 | 2                  | 8              | 8              | 4.9             | 5                 | 0               | 14990           | 811.2            | 365                | 4254          | 14684441      | 236395.3       | 15505            |
| 3                 | 3                  | 7964           | 7964           | 79.7            | 25                | 16              | 1277216         | 7511.0           | 2019               | 4253          | 54998517      | 530118.4       | 34637            |

Table 3: Clustering - Covid Low Credibility

| followers_cluster | engagement_cluster | engagement_min | engagement_max | engagement_mean | engagement_median | impressions_min | impressions_max | impressions_mean | impressions_median | followers_min | followers_max | followers_mean | followers_median |
|-------------------|--------------------|----------------|----------------|-----------------|-------------------|-----------------|-----------------|------------------|--------------------|---------------|---------------|----------------|------------------|
| 0                 | 0                  | 0              | 0              | 0               | 0                 | 0               | 1313            | 6.5              | 3                  | 0             | 93            | 30.5           | 24               |
| 0                 | 1                  | 1              | 1              | 1               | 1                 | 0               | 785             | 23.6             | 12                 | 0             | 93            | 34.4           | 28               |
| 0                 | 2                  | 5              | 2.6            | 2               | 2                 | 1               | 2778            | 68.5             | 32                 | 0             | 93            | 40.2           | 36               |
| 0                 | 3                  | 202            | 18.5           | 9               | 9                 | 6               | 14797           | 601.1            | 240                | 0             | 93            | 46.7           | 47               |
| 1                 | 0                  | 0              | 0.0            | 0               | 0                 | 0               | 703             | 8.9              | 4                  | 84            | 526           | 247.1          | 216              |
| 1                 | 1                  | 1              | 1.0            | 1               | 1                 | 0               | 921             | 24.7             | 14                 | 94            | 526           | 263.5          | 238              |
| 1                 | 2                  | 5              | 2.7            | 2               | 2                 | 1               | 6863            | 59.6             | 30                 | 94            | 526           | 271.5          | 245              |
| 1                 | 3                  | 1284           | 21.1           | 9               | 9                 | 11              | 34327           | 579.6            | 189                | 94            | 523           | 280.8          | 264              |
| 2                 | 0                  | 0              | 0.0            | 0               | 0                 | 0               | 1337            | 12.1             | 7                  | 527           | 2409          | 1144.9         | 989              |
| 2                 | 1                  | 1              | 1.0            | 1               | 1                 | 0               | 2023            | 29.4             | 17                 | 527           | 2409          | 1186.2         | 1046.5           |
| 2                 | 2                  | 5              | 2.7            | 2               | 2                 | 0               | 774             | 23.6             | 12                 | 527           | 2409          | 1186.2         | 1046.5           |
| 2                 | 3                  | 2068           | 25.2           | 10              | 10                | 16              | 27154           | 738.8            | 331                | 527           | 2408          | 1336.8         | 1284             |
| 3                 | 0                  | 0              | 0.0            | 0               | 0                 | 0               | 2748            | 23.7             | 10                 | 2410          | 4745856       | 11189.5        | 3715             |
| 3                 | 1                  | 1              | 1.0            | 1               | 1                 | 0               | 4062            | 67.0             | 25                 | 2415          | 4325447       | 24882.7        | 4318             |
| 3                 | 2                  | 5              | 3.0            | 3               | 3                 | 2               | 10799           | 538.2            | 162                | 2411          | 4745856       | 86586.3        | 5349             |
| 3                 | 3                  | 104650         | 410.6          | 29              | 29                | 0               | 3624695         | 14448.5          | 1935               | 2412          | 11252986      | 198610.1       | 20109            |

Table 4: Clustering - Covid High Credibility

| followers_cluster | engagement_cluster | engagement_min | engagement_max | engagement_mean | engagement_median | impressions_min | impressions_max | impressions_mean | impressions_median | followers_min | followers_max | followers_mean | followers_median |
|-------------------|--------------------|----------------|----------------|-----------------|-------------------|-----------------|-----------------|------------------|--------------------|---------------|---------------|----------------|------------------|
| 0                 | 0                  | 0              | 0              | 0               | 0                 | 0               | 2982            | 13.4             | 6                  | 0             | 93            | 32.7           | 26               |
| 0                 | 1                  | 1              | 1              | 1               | 1                 | 0               | 807             | 33.2             | 17                 | 0             | 93            | 37.1           | 33               |
| 0                 | 2                  | 2              | 2.7            | 2.7             | 2                 | 0               | 687             | 85.1             | 38                 | 0             | 93            | 39.3           | 36               |
| 0                 | 3                  | 0              | 16.7           | 0.0             | 0                 | 0               | 19748           | 138.2            | 270                | 0             | 93            | 47.2           | 36               |
| 1                 | 1                  | 1              | 1.0            | 1.0             | 1                 | 0               | 107             | 17.1             | 20                 | 94            | 536           | 250.2          | 235              |
| 1                 | 2                  | 1              | 2.8            | 2.8             | 2                 | 0               | 10188           | 30.0             | 20                 | 94            | 536           | 269.6          | 242              |
| 1                 | 3                  | 5              | 20.6           | 20.6            | 10                | 0               | 7717            | 93.0             | 44                 | 94            | 536           | 270.9          | 254              |
| 2                 | 0                  | 0              | 0.0            | 0.0             | 0                 | 0               | 136671          | 1039.5           | 292                | 94            | 536           | 284.2          | 263              |
| 2                 | 1                  | 1              | 1.0            | 1.0             | 1                 | 0               | 5875            | 22.6             | 13                 | 527           | 2408          | 1221.9         | 1135             |
| 2                 | 2                  | 1              | 1.0            | 1.0             | 1                 | 0               | 3797            | 46.1             | 25                 | 527           | 2409          | 1217.6         | 1112             |
| 2                 | 3                  | 5              | 2.9            | 2.9             | 3                 | 0               | 9747            | 108.0            | 55                 | 527           | 2409          | 1249.9         | 1161             |
| 3                 | 0                  | 0              | 0.0            | 0.0             | 0                 | 0               | 366959          | 1373.3           | 341                | 527           | 2409          | 1328.4         | 1276             |
| 3                 | 1                  | 1              | 1.0            | 1.0             | 1                 | 0               | 8194            | 120.6            | 29                 | 2410          | 8920800       | 29010.4        | 6114             |
| 3                 | 2                  | 2              | 3.1            | 3.1             | 3                 | 0               | 7578            | 266.1            | 69                 | 2410          | 14684264      | 67376.9        | 6892             |
| 3                 | 3                  | 5              | 173.3          | 173.3           | 22                | 0               | 11382           | 547.4            | 176                | 2410          | 20629935      | 156920.7       | 9275             |
| 3                 | 6                  | 109790         | 173.3          | 173.3           | 22                | 0               | 9488255         | 11384.8          | 1621               | 2410          | 18792639      | 382110.9       | 19597            |

## 2 Distribution of Engagement and Followers Data

To complement the information provided above, this section presents the log-log plots for the distribution of engagement and followers data.

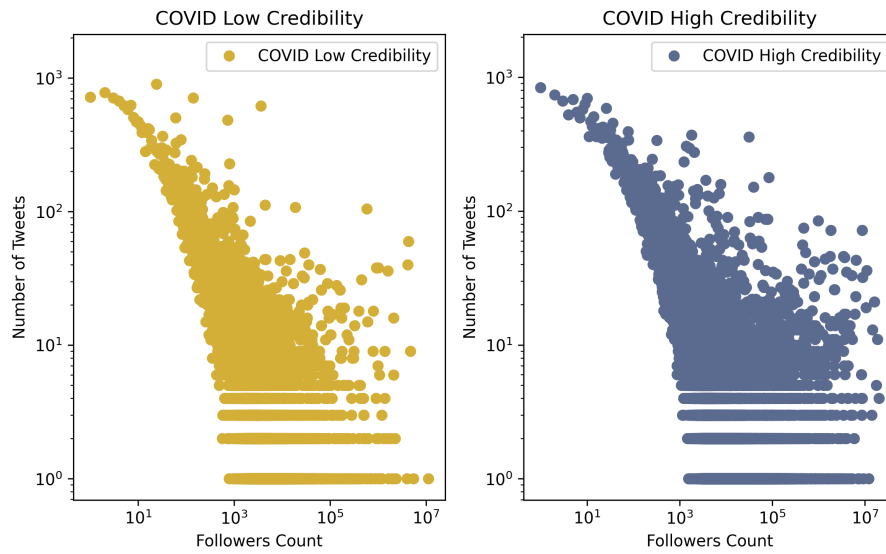

Figure 1: Log-Log Plot of Tweet Volume Versus Total Engagement for high-credibility and low-credibility COVID-Related Content

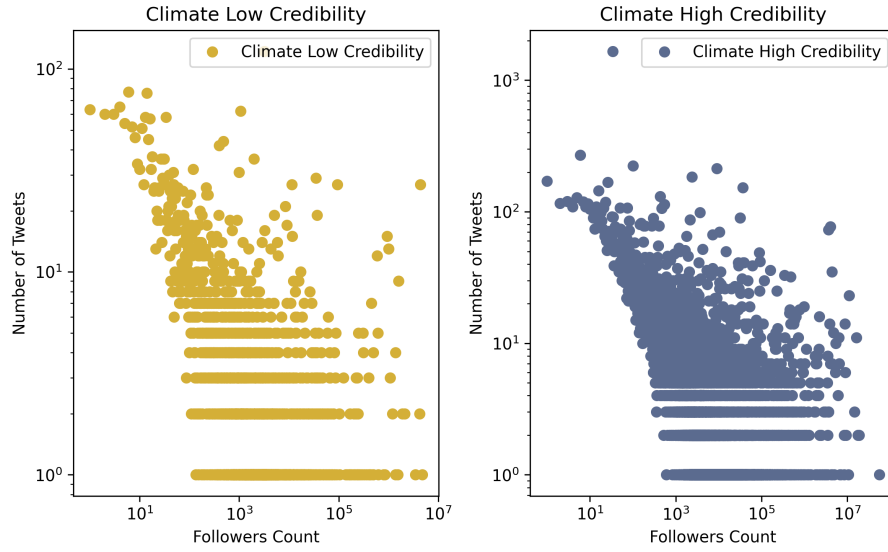

Figure 2: Log-Log Plot of Tweet Volume Versus Total Engagement for high-credibility and low-credibility Climate-Related Content

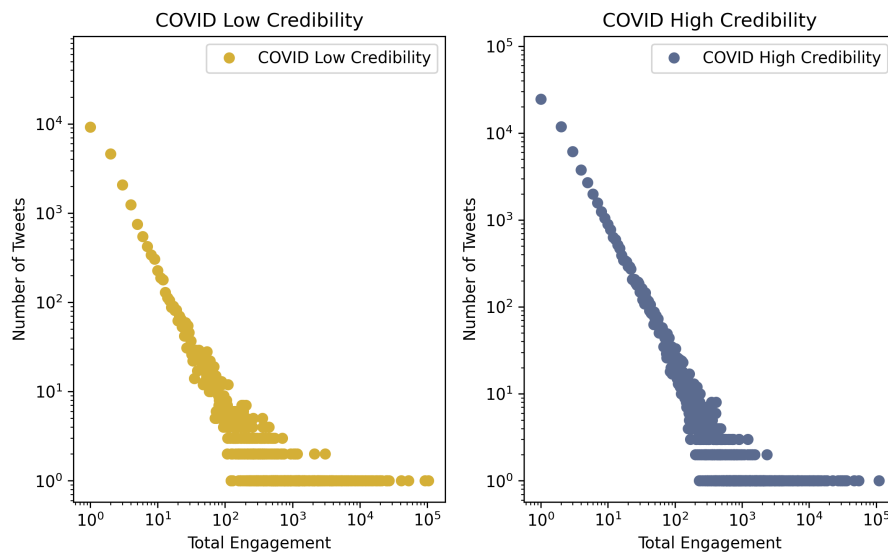

Figure 3: Log-Log Plot of Tweet Volume Versus Total User followers for high-credibility and low-credibility COVID-Related Content

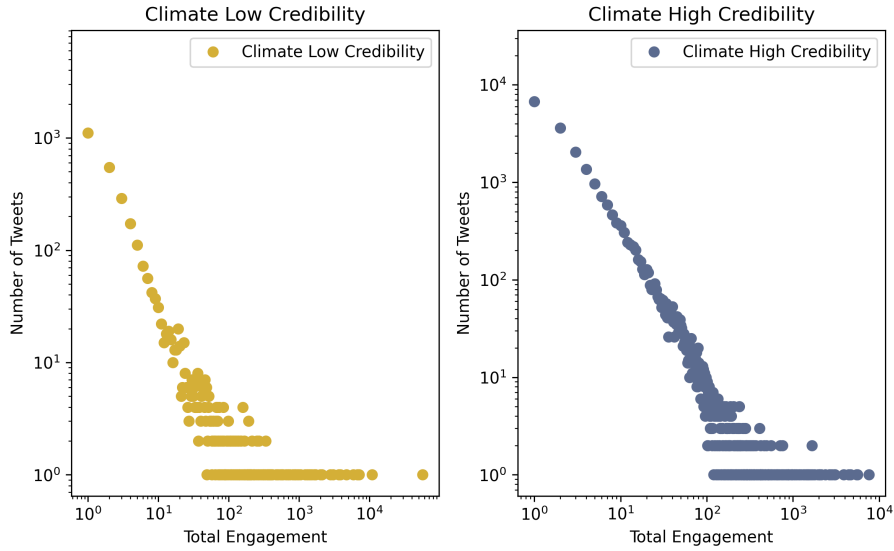

Figure 4: Log-Log Plot of Tweet Volume Versus Total User followers for high-credibility and low-credibility Climate-Related Content

### 3 Political Bias Annotation with the GPT-4 API

The political bias of URL domains was annotated using a custom-built zero-shot classifier, utilising the GPT-4 API. To achieve high replicability and to minimise the influence of randomness in responses, the temperature parameter was fixed at 0. The classifier was instructed through a system message: 'You are an assistant tasked with helping users identify the political bias of websites'. The main prompt used for bias assessment was formulated as follows: "Evaluate the political bias of the website 'domain' using the labels 'far-right', 'right', 'neutral', 'left', 'far-left'. If you lack information about the website, assign a score of -1". An example of the expected data format was provided to the model, though it was not shown any specific examples of the labelling task itself. This step was critical to ensure the clarity and uniformity of the data output.
